# Supplementary material for: Facile fabrication of porous Cr-doped SrTiO3 nanotubes by electrospinning and their enhanced visible-light-driven photocatalytic properties
Source: Royal Society of Chemistry journal article supplement (doi:10.1039/c4ta05485g), 2015-01-01
Supplement: c4ta05485g1.pdf [file c4ta05485g1.pdf]

## ***Supplementary Information***

### **Facile fabrication of porous Cr-doped SrTiO<sub>3</sub> nanotubes by electrospinning and their enhanced visible-light-driven photocatalytic properties**

**Dongfang Hou,<sup>a,c</sup> Xianluo Hu,<sup>b,\*</sup> Wingkei Ho,<sup>c,\*</sup> Pei Hu,<sup>b</sup> and Yunhui**

**Huang<sup>b</sup>**

*<sup>a</sup>College of Material and Chemical Engineering, Three Gorges University, Yichang 443002, China*

*<sup>b</sup>State Key Laboratory of Materials Processing and Die & Mould Technology, School of Materials Science and Engineering, Huazhong University of Science and Technology, Wuhan 430074, China*

*<sup>c</sup>Department of Science and Environmental Studies, The Centre for Education in Environmental Sustainability, The Hong Kong Institute of Education, Hong Kong, China*

*Corresponding Author. E-mail address: [huxl@mail.hust.edu.cn](mailto:huxl@mail.hust.edu.cn) (X. L. Hu);*

*[keithho@ied.edu.hk](mailto:keithho@ied.edu.hk) (W. K. Ho)*

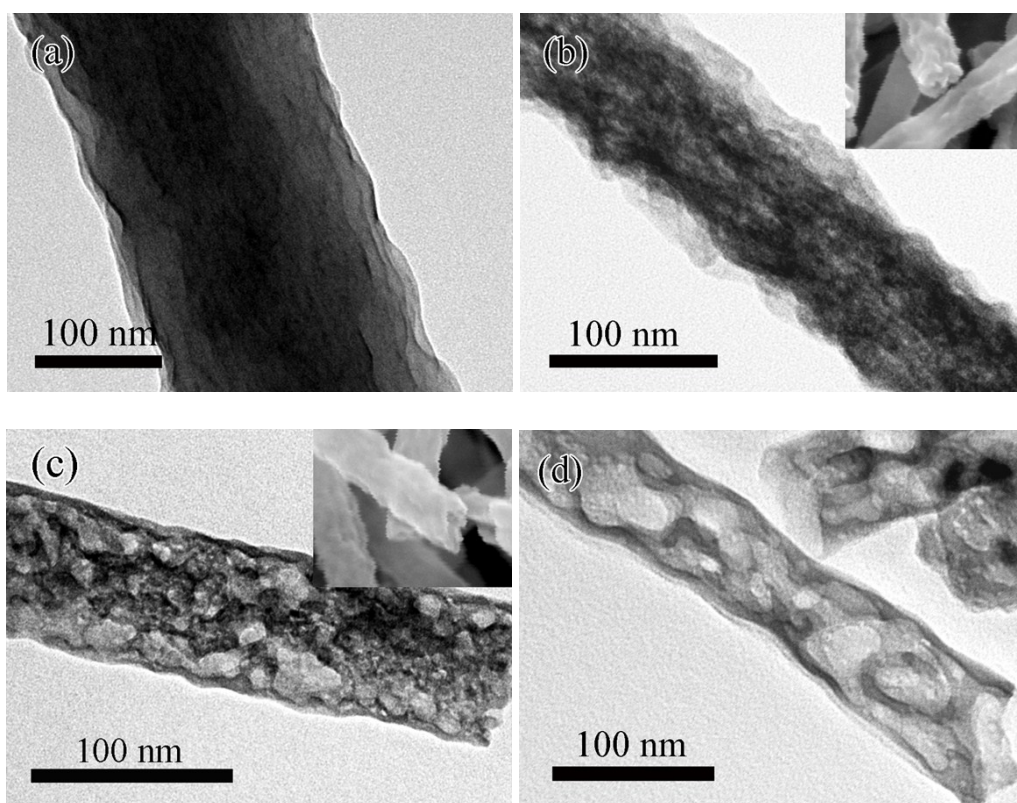

**Fig. S1** Representative TEM images of the products obtained at different temperatures of (a) 300 °C, (b) 400 °C, (c) 500 °C, and (d) 600 °C.

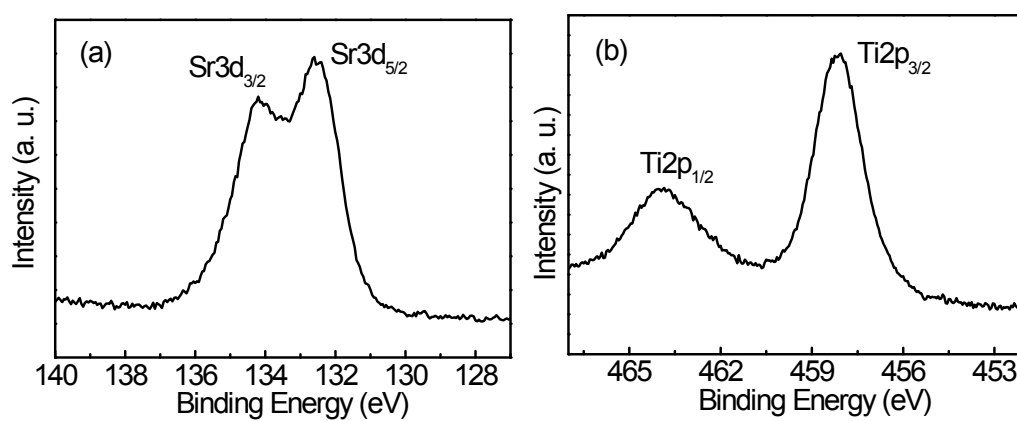

**Fig. S2** High-resolution XPS spectra of Cr4-STO: (a) Sr 3d, (b) Ti 2p.

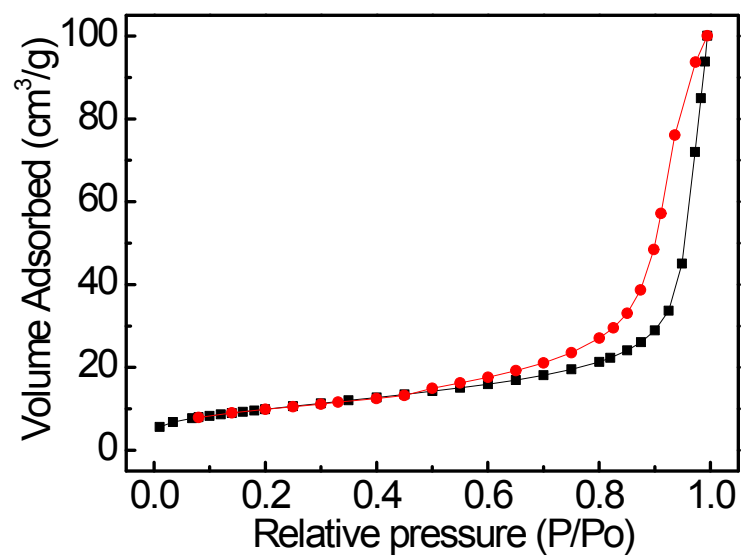

**Fig. S3** N<sub>2</sub> adsorption–desorption isotherms of ground Cr<sub>4</sub>–STO powders
